# Supplementary material
Source: publisher figshare collection journal article supplement (https://gsapubs.figshare.com/ndownloader/files/23304299)
Supplement: Supplementary file 1 [file 23304299]

## Sheet: Station 1
STATION 1
Sampling date	High marsh/ freshwater (%)	Low marsh (%)	Tidal flat (%)	Top diatoms (>4%)
2011-08-17	77.2834	17.3302	5.38642	Denticula subtilis (25%), Navicula cryptotenella (16%), Luticola mutica (10%), Tryblionella debilis (9%), Navicula cincta (8%), Pinnularia lagerstedtii (6%), Planothidium lanceolatum (5%)
2011-09-02	29.979	36.478	33.543	Melosira moniliformis (15%), Tryblionella debilis (11%), Denticula subtilis (11%), Rhopalodia musculus (10%), Planothidium delicatulum (8%), Navicula peregrina (7%), Planothidium lanceolatum (5%), Navicula cryptonella (4%)
2011-09-14	38.3747	30.6998	30.9255	Denticula subtilis (14%), Tryblionella debilis (13%), Luticola mutica (8%), Planothidium lanceolatum (8%), Thalassiosira pacifica (6%), Melosira moniliformis (6%), Pinnularia lagerstedtii (6%), Thalassiosira antiqua (6%)
2011-09-28	37.746	26.6547	35.5993	Denticula subtilis (13%), Tryblionella debilis (9%), Melosira moniliformis (7%), Luticola mutica (7%), Rhopalodia musculus (6%), Thalassiosira antiqua (6%), Navicula cryptotenella (6%), Thalassiosira pacifica (6%), Planothidium delicatulum (5%)
2011-11-07	39.1382	24.4165	36.4452	Denticula subtilis (11%), Tryblionella debilis (9%), Melosira moniliformis (8%), Luticola mutica (7%), Navicula cryptotenella (6%), Thalassiosira antiqua (5%)
2011-12-14	39.6825	25.5952	34.7222	Denticula subtilis (14%), Tryblionella debilis (9%), Thalassiosira antiqua (7%), Navicula peregrina (6%), Luticola mutica (5%), Rhopalodia musculus (5%), Melosira moniliformis (5%), Thalassiosira pacifica (5%)
2012-01-12	33.6634	27.9208	38.4158	Denticula subtilis (13%), Tryblionella debilis (7%), Thalassiosira antiqua (7%), Planothidium lanceolatum (5%), Planothidium sp (5%), Cocconeis scutellum (4%), Planothidium delicatulum (4%)
2012-02-09	42.8571	25.1599	31.9829	Denticula subtilis (9%), Tryblionella debilis (8%), Navicula cryptotenella (7%), Luticola mutica (6%), Thalassiosira antiqua (6%), Nitzschia commutata (5%), Cocconeis scutellum (5%), Thalassiosira pacifica (5%), Navicula gregaria (5%)
2012-03-09	33.0435	25	41.9565	Thalassiosira antiqua (9%), Denticula subtilis (7%), Tryblionella debilis (7%), Luticola mutica (7%), Navicula peregrina (7%), Thalassiosira pacifica (6%), Planothidium lanceolatum (5%), Planothidium delicatulum (5%)
2012-05-16	28.6957	27.1739	44.1304	Surirella brebissonii (7%), Luticola mutica (6%), Cosmioneis pusilla (5%), Thalassiosira antiqua (5%), Cocconeis scutellum (5%), Navicula gregaria (5%), Thalassiosira pacifica (5%), Bacillaria paradoxa (4%), Melosira moniliformis (4%), Tryblionella levidensis (4%)
2012-06-19	24.9471	24.9471	50.1057	Luticola mutica (10%), Surirella brebissonii (9%), Melosira moniliformis (9%), Melosira nummuloides (7%), Thalassiosira antiqua (6%), Navicula peregrina (6%), Thalassiosira pacifica (6%), Pinnularia lagerstedtii (4%), Cosmioneis pusilla (4%), Cocconeis scutellum (4%)
2012-07-24	12.2677	26.9517	60.7807	Melosira moniliformis (17%), Melosira nummuloides (9%), Nitzschia dubia (7%), Surirella brebissonii (7%), Gyrosigma acuminatum (4%), Thalassiosira antiqua (4%), Navicula gregaria (4%), Tryblionella levidensis (4%), Navicula peregrina (4%), Planothidium delicatulum (4%), Thalassiosira pacifica (4%)
2012-08-29	11.9658	28.0342	60	Melosira moniliformis (15%), Melosira nummuloides (7%), Surirella brebissonii (7%), Nitzschia dubia (6%), Cocconeis scutellum (6%), Planothidium delicatulum (6%), Bacillaria paradoxa (5%), Thalassiosira antiqua (4%), Navicula peregrina (4%), Thalassiosira pacifica (4%)
2013-09-24	6.46465	31.3131	62.2222	Rhopalodia musculus (11%), Mastogloia exigua (10%), Navicula peregrina (8%), Thalassiosira antiqua (6%), Cocconeis scutellum (6%), Planothidium delicatulum (6%), Surirella brebissonii (5%), Thalassiosira pacifica (5%), Melosira moniliformis (5%), Melosira nummuloides (5%), Navicula gregaria (4%), Delphineis surirella (4%)
2014-03-12	2.71605	26.9136	70.3704	Navicula peregrina (10%), Cocconeis scutellum (6%), Thalassiosira pacifica (6%), Tryblionella levidensis (6%), Thalassiosira antiqua (5%), Rhopalodia musculus (5%), Delphineis surirella (4%), Gyrosigma acuminatum (4%), Surirella brebissonii (4%), Bacillaria paradoxa (4%), Nitzschia dubia (4%), Actinoptychus senarius (4%)
2015-03-10	4.55581	29.1572	66.287	Cocconeis scutellum (9%), Bacillaria paradoxa (7%), Navicula peregrina (7%), Surirella brebissonii (6%), Tryblionella levidensis (6%), Thalassiosira antiqua (6%), Gyrosigma acuminatum (6%), Nitzschia dubia (5%), Planothidium delicatulum (5%), Thalassiosira pacifica (5%), Surirella ovalis (4%), Nitzschia sigma (4%)

## Sheet: Station 2
STATION 2
Sampling date	High marsh/ freshwater (%)	Low marsh (%)	Tidal flat (%)	Top diatoms (>4%)
2011-08-17	84.6906	5.53746	9.77199	Pinnularia microstauron (12%), Pinnularia viridis (10%), Gomphonema parvulum (8%), Pinnularia intermedia (8%), Luticola mutica (7%), Cosmioneis pusilla (6%), Denticula subtilis (6%), Nitzschia commutata (5%), Pinnularia lagerstedtii (5%), Stauroneis anceps (5%)
2011-09-02	52.356	29.5812	18.0628	Stauroneis anceps (16%), Pinnularia viridis (8%), Pinnularia microstauron (7%), Nitzschia dubia (6%), Surirella brebissonii (6%), Pinnularia intermedia (6%), Surirella ovalis (5%), Nitzschia scapelliformis (4%), Nitzschia brevissima (4%), Nitzschia commutata (4%), Navicula peregrina (4%), Cosmioneis pusilla (4%)
2011-09-14	44.8931	35.6295	19.4774	Stauroneis anceps (10%), Nitzschia dubia (6%), Nitzschia commutata (6%), Planothidium lanceolatum (6%), Pinnularia viridis (6%), Navicula peregrina (5%), Surirella brebissonii (5%), Nitzschia sigma (5%), Pinnularia microstauron (5%), Pinnularia intermedia (5%), Nitzschia brevissima (4%), Navicula gregaria (4%), Pinnularia lagerstedtii (4%)
2011-09-28	40.1985	32.7543	27.0471	Stauroneis anceps (10%), Surirella brebissonii (8%), Nitzschia commutata (8%), Nitzschia sigma (5%), Navicula peregrina (5%), Nitzschia brevissima (5%), Planothidium lanceolatum (5%), Pinnularia microstauron (4%)
2011-11-07	49.7423	30.1546	20.1031	Nitzschia commutata (10%) Stauroneis anceps (8%), Planothidium lanceolatum (6%), Pinnularia microstauron (6%), Pinnularia intermedia (6%), Pinnularia viridis (6%), Navicula peregrina (5%), Surirella brebissonii (5%)
2011-12-14	35.2273	33.5227	31.25	Nitzschia commutata (9%), Nitzschia dubia (8%), Stauroneis anceps (7%), Surirella brebissonii (7%), Planothidium lanceolatum (6%), Pinnularia microstauron (5%), Pinnularia viridis (4%), Delphineis surirella (3%)
2012-01-12	40.5868	35.9413	23.4719	Stauroneis anceps (8%), Nitzschia commutata (8%), Nitzschia dubia (8%), Nitzschia scapelliformis (7%), Planothidium lanceolatum (5%), Surirella brebissonii (5%), Pinnularia microstauron (5%), Navicula gregaria (5%), Pinnularia viridis (4%)
2012-02-09	35.2332	28.7565	36.0104	Nitzschia commutata (9%), Nitzschia scapelliformis (6%), Planothidium lanceolatum (6%), Pinnularia microstauron (4%), Melosira moniliformis (4%), Stauroneis anceps (4%), Navicula gregaria (4%), Thalassiosira pacifica (4%) Nitzschia brevissima (4%), Pinnularia intermedia (4%), Pinnularia viridis (4%)
2012-03-09	33.2627	30.9322	35.8051	Nitzschia commutata (8%), Nitzschia dubia (7%), Navicula gregaria (6%), Stauroneis anceps (5%), Nitzschia scapelliformis (5%), Pinnularia microstauron (4%), Melosira moniliformis (4%), Thalassiosira pacifica (4%), Planothidium lanceolatum (4%), Surirella brebissonii (4%), Thalassiosira antiqua (4%)
2012-05-16	34.7032	25.5708	39.726	Nitzschia commutata (9%), Melosira moniliformis (7%), Melosira nummuloides (5%), Stauroneis anceps (5%), Nitzschia scapelliformis (5%), Planothidium lanceolatum (5%), Nitzschia dubia (4%), Surirella brebissonii (4%), Luticola mutica (4%), Pinnularia viridis (4%)
2012-06-19	40.8964	22.9692	42.2969	Nitzschia commutata (6%), Pinnularia microstauron (5%), Stauroneis anceps (5%), Pinnularia intermedia (5%), Cocconeis scutellum (5%), Thalassiosira pacifica (4%), Pinnularia viridis (4%), Pinnularia lagerstedtii (4%), Cavinula lapidosa (4%)
2012-07-24	46.0894	22.067	33.5196	Nitzschia commutata (10%), Pinnularia intermedia (6%), Stauroneis anceps (6%), Pinnularia viridis (5%), Cosmioneis pusilla (4%), Cocconeis scutellum (4%), Pinnularia microstauron (4%), Cavinula lapidosa (4%), Navicula peregrina (4%)
2012-08-29	34.375	29.4922	36.1328	Navicula gregaria (7%), Melosira moniliformis (6%), Surirella brebissonii (6%), Nitzschia brevissima (5%), Nitzschia scapelliformis (5%), Planothidium delicatulum (5%), Navicula peregrina (5%), Fragilaria sp1 (5%), Cocconeis scutellum (5%), Planothidium lanceolatum (4%), Nitzschia commutata (4%), Cosmioneis pusilla (4%), Luticola mutica (4%)
2013-09-24	18.2186	36.8421	44.9393	Navicula peregrina (11%), Planothidium delicatulum (8%), Navicula gregaria (6%), Cocconeis scutellum (6%), Surirella brebissonii (6%), Luticola mutica (5%), Cosmioneis pusilla (4%), Thalassiosira pacifica (4%)
2014-03-12	16.7059	38.1176	45.1765	Navicula peregrina (12%), Planothidium delicatulum (8%), Navicula gregaria (7%), Cocconeis scutellum (5%), Surirella brebissonii (5%), Luticola mutica (5%), Cosmioneis pusilla (4%), Navicula salinarium (4%), Bacillaria paradoxa (4%)
2014-09-04	13.5135	37.3464	49.14	Navicula peregrina (12%), Planothidium delicatulum (8%), Cocconeis scutellum (6%), Surirella brebissonii (6%), Navicula gregaria (5%), Gyrosigma acuminatum (5%), Navicula salinarium (4%), Planothidium lanceolatum (5%), Bacillaria paradoxa (4%), Melosira moniliformis (4%)

## Sheet: Station 3
STATION 3
Sampling date	High marsh/ freshwater (%)	Low marsh (%)	Tidal flat (%)	Top diatoms (>4%)
2011-08-17	88.7719	4.91228	6.31579	Pinnularia microstauron (12%), Nitzschia commutata (10%), Pinnularia intermedia (10%), Pinnularia viridis (9%), Cosmioneis pusilla (7%), Pinnularia lagerstedtii (6%), Eunotia pectinales (6%), Luticola mutica (6%), Gomphonema parvulum (5%), Diploneis ovalis (5%), Nitzschia brevissima (4%)
2011-09-02	82.0513	1.28205	16.6667	Nitzschia commutata (15%), Pinnularia intermedia (13%), Pinnularia microstauron (12%), Cosmioneis pusilla (9%), Eunotia pectinales (8%), Pinnularia lagerstedtii (7%), Pinnularia viridis (6%), Luticola mutica (5%), Nitzschia sigma (5%)
2011-09-14	78.481	3.37553	18.1435	Nitzschia commutata (15%), Pinnularia microstauron (12%), Pinnularia intermedia (11%), Pinnularia lagerstedtii (11%), Pinnularia viridis (7%), Cosmioneis pusilla (7%), Diploneis ovalis (5%), Eunotia pectinales (4%), Nitzschia sigma (4%)
2011-09-28	82.1739	5.65217	12.1739	Nitzschia commutata (17%), Pinnularia microstauron (16%), Pinnularia lagerstedtii (14%), Pinnularia intermedia (11%), Cosmioneis pusilla (8%), Pinnularia viridis (6%), Caloneis westii (4%)
2011-11-07	79.2208	8.22511	12.5541	Nitzschia commutata (16%), Pinnularia microstauron (14%), Pinnularia intermedia (12%), Pinnularia lagerstedtii (11%), Cosmioneis pusilla (10%), Pinnularia viridis (5%), Caloneis westii (5%)
2011-12-14	75.0958	10.3448	14.5594	Nitzschia commutata (16%), Pinnularia microstauron (13%), Pinnularia intermedia (13%), Pinnularia lagerstedtii (11%), Cosmioneis pusilla (10%), Pinnularia viridis (5%), Caloneis westii (4%)
2012-01-12	70.1195	11.1554	18.7251	Nitzschia commutata (17%), Pinnularia microstauron (12%), Pinnularia lagerstedtii (12%), Pinnularia intermedia (11%), Cosmioneis pusilla (8%), Caloneis westii (5%), Pinnularia viridis (4%), Cocconeis scutellum (4%)
2012-02-09	70	9.6	20.4	Nitzschia commutata (18%), Pinnularia intermedia (12%), Pinnularia microstauron (11%), Pinnularia lagerstedtii (10%), Cosmioneis pusilla (7%), Pinnularia viridis (4%), Caloneis westii (4%), Nitzschia sigma (4%)
2012-03-09	60.219	20.438	19.3431	Nitzschia commutata (16%), Pinnularia intermedia (10%), Pinnularia microstauron (9%), Pinnularia lagerstedtii (8%), Cosmioneis pusilla (7%), Caloneis westii (5%), Planothidium lanceolatum (4%), Nitzschia sigma (4%)
2012-05-16	63.6986	18.1507	18.1507	Nitzschia commutata (14%), Pinnularia intermedia (12%), Cosmioneis pusilla (7%), Pinnularia microstauron (7%), Pinnularia lagerstedtii (7%), Luticola mutica (7%), Pinnularia viridis (5%), Planothidium lanceolatum (5%), Caloneis westii (4%)
2012-06-19	66.1017	18.3051	15.5932	Nitzschia commutata (14%), Pinnularia intermedia (11%), Cosmioneis pusilla (9%), Luticola mutica (8%), Pinnularia microstauron (6%), Pinnularia lagerstedtii (6%), Pinnularia viridis (5%), Planothidium lanceolatum (4%)
2012-07-24	60.596	20.5298	18.8742	Nitzschia commutata (13%), Pinnularia intermedia (10%), Cosmioneis pusilla (8%), Luticola mutica (8%), Pinnularia lagerstedtii (7%), Pinnularia microstauron (6%), Caloneis westii (4%), Navicula gregaria (4%), Navicula peregrina (4%)
2012-08-29	56.9579	22.9773	20.0647	Nitzschia commutata (12%), Pinnularia intermedia (10%), Cosmioneis pusilla (8%), Pinnularia lagerstedtii (7%), Luticola mutica (7%), Pinnularia microstauron (5%), Navicula gregaria (5%), Planothidium lanceolatum (5%), Caloneis westii (4%)
2013-09-24	44.6556	28.5036	26.8409	Luticola mutica (9%), Cosmioneis pusilla (7%), Pinnularia lagerstedtii (7%), Nitzschia commutata (7%), Pinnularia intermedia (6%), Navicula gregaria (6%), Navicula peregrina (5%), Surirella brebissonii (5%), Planothidium sp (4%), Pinnularia microstauron (4%)
2014-03-12	44.4685	29.9349	25.5965	Luticola mutica (9%), Pinnularia lagerstedtii (8%), Cosmioneis pusilla (7%), Navicula gregaria (7%), Nitzschia commutata (7%), Navicula peregrina (5%), Pinnularia intermedia (5%), Surirella brebissonii (5%), Tryblionella debilis (4%), Cocconeis scutellum (4%)
2014-09-04	41.4458	32.5301	26.0241	Luticola mutica (9%), Pinnularia lagerstedtii (8%), Cosmioneis pusilla (8%),Navicula gregaria (8%), Nitzschia commutata (7%), Tryblionella debilis (5%), Navicula peregrina (5%), Surirella brebissonii (4%), Pinnularia intermedia (4%)
